# Supplementary material
Source: PubMed Central journal article supplement (PMC4495204)
Supplement: AEM.00861-15_zam999116433so1.pdf [file AEM.00861-15_zam999116433so1.pdf]

Table S1: Number of birds sampled, by taxonomy

| Order                  | Family            | Genus                     | Host Species             | Common Name              | Number of Birds           |             |
|------------------------|-------------------|---------------------------|--------------------------|--------------------------|---------------------------|-------------|
| Anseriformes           | Anatidae          | Anas                      | <i>A. superciliosa</i>   | Pacific Black Duck       | 4                         |             |
|                        |                   |                           | N/A                      | Poultry Duck             | 21                        |             |
|                        |                   | Anser                     | N/A                      | Poultry Goose            | 5                         |             |
|                        |                   | Chenonetta                | <i>C. jubata</i>         | Maned Duck               | 8                         |             |
|                        |                   | Cygnus                    | <i>C. atratus</i>        | Black Swan               | 1                         |             |
|                        |                   | Oxyura                    | <i>O. australis</i>      | Blue-billed Duck         | 1                         |             |
| Charadriiformes        | Charadriidae      | Vanellus                  | <i>V. miles</i>          | Masked Lapwing           | 1                         |             |
|                        | Scolopacidae      | Numenius                  | <i>N. sp</i>             | Curlew                   | 3                         |             |
|                        | Sternidae         | Thalasseus                | <i>T. bergii</i>         | Crested Tern             | 1                         |             |
| <i>T. sp</i>           |                   |                           | Tern                     | 1                        |                           |             |
| Ciconiiformes          | Accipitridae      | Circus                    | <i>C. approximans</i>    | Swamp Harrier            | 2                         |             |
|                        |                   |                           | <i>C. assimilis</i>      | Spotted Harrier          | 1                         |             |
|                        | Ardeidae          | Bubulcus                  | <i>B. ibis</i>           | Cattle Egret             | 2                         |             |
|                        |                   |                           | Laridae                  | Chroicocephalus          | <i>C. novaehollandiae</i> | Silver Gull |
|                        | Larus             | <i>L. dominicanus</i>     |                          |                          | Kelp Gull                 | 1           |
|                        |                   | <i>L. novaehollandiae</i> |                          |                          | Silver Gull               | 3           |
|                        |                   | <i>L. pacificus</i>       |                          |                          | Pacific Gull              | 2           |
|                        | Threskiornithidae | Threskiornis              | <i>T. molucca</i>        | Australian White Ibis    | 3                         |             |
|                        |                   |                           | <i>T. spinicollis</i>    | Straw-necked Ibis        | 1                         |             |
|                        | Columbiformes     | Columbidae                | Columba                  | N/A                      | Poultry Pigeon            | 2           |
| Geopelia               |                   |                           |                          | <i>G. humeralis</i>      | Bar-shouldered Dove       | 1           |
|                        |                   |                           | <i>G. striata</i>        | Peaceful Dove            | 1                         |             |
|                        |                   |                           | Ocyphaps                 | <i>O. lophotes</i>       | Crested Pigeon            | 2           |
| Phaps                  |                   |                           | Streptopelia             | <i>P. chalcoptera</i>    | Bronzewing Pigeon         | 6           |
|                        |                   |                           |                          | <i>S. chinensis</i>      | Spotted Turtle Dove       | 2           |
| <i>S. risoria</i>      |                   |                           | Barbary Dove Poultry     | 1                        |                           |             |
| <i>S. senegalensis</i> | Turtle Dove       | 4                         |                          |                          |                           |             |
| Coraciiformes          | Halcyonidae       | Dacelo                    | <i>D. novaeguineae</i>   | Kookaburra               | 22                        |             |
| Cuculiformes           | Cuculidae         | Centropus                 | <i>C. phasianinus</i>    | Pheasant Coucal          | 2                         |             |
|                        |                   | Chrysococcyx              | <i>C. basalis</i>        | Horsefield Bronze Cuckoo | 1                         |             |
|                        |                   | Cuculus                   | <i>C. flabelliformis</i> | Fan-tailed Cuckoo        | 3                         |             |
| Falconiformes          | Accipitridae      | Accipiter                 | <i>A. cirrocephalus</i>  | Collared Sparrowhawk     | 1                         |             |
|                        |                   |                           | <i>A. fasciatus</i>      | Goshawk                  | 1                         |             |
|                        | Falconidae        | Falco                     | <i>F. berigora</i>       | Brown Falcon             | 7                         |             |
|                        |                   |                           | <i>F. cenchroides</i>    | Nankeen Kestrel          | 1                         |             |
|                        |                   |                           | <i>F. peregrinus</i>     | Peregrine Falcon         | 1                         |             |
| <i>F. berigora</i>     | Brown Falcon      | 1                         |                          |                          |                           |             |
| Galliformes            | Megapodiidae      | Alectura                  | <i>A. lathami</i>        | Australian Brush-turkey  | 3                         |             |
|                        | Numididae         | Numida                    | N/A                      | Poultry Guinea Fowl      | 1                         |             |
|                        | Phasianidae       | Coturnix                  | <i>C. ypsilophora</i>    | Brown Quail              | 1                         |             |
|                        |                   |                           | N/A                      | Poultry Japanese Quail   | 1                         |             |
|                        |                   |                           | Gallus                   | N/A                      | Poultry Chicken           | 137         |
| Gruiformes             | Rallidae          | Gallinula                 | <i>G. tenebrosa</i>      | Dusky Moorhen            | 2                         |             |
|                        |                   |                           | <i>G. philippensis</i>   | Buff-banded Rail         | 2                         |             |
|                        |                   | Porphyrio                 | <i>P. porphyrio</i>      | Purple Swamphen          | 1                         |             |
| Passeriformes          | Artamidae         | Cracticus                 | <i>C. torquatus</i>      | Grey Butcherbird         | 1                         |             |
|                        |                   | Gymnorhina                | <i>G. tibicen</i>        | Australian Magpie        | 37                        |             |
|                        |                   | Strepera                  | <i>S. graculina</i>      | Pied Currawong           | 4                         |             |

|                |                     |                        |                           |                           |                         |   |
|----------------|---------------------|------------------------|---------------------------|---------------------------|-------------------------|---|
| Passeriformes  | Campephagidae       | Coracina               | <i>C. novaehollandiae</i> | Black-faced Cuckoo-shrike | 1                       |   |
|                | Climacteridae       | Climacteris            | <i>C. picumnus</i>        | Brown Treecreeper         | 1                       |   |
|                | Corvidae            | Corvus                 | <i>C. coronoides</i>      | Australian Raven          | 4                       |   |
|                |                     |                        | <i>C. sp</i>              | Crow                      | 2                       |   |
|                | Eopsaltriidae       | Eopsaltria             | <i>E. australis</i>       | Eastern Yellow Robin      | 1                       |   |
|                |                     |                        | <i>M. fascians</i>        | Jacky Winter              | 1                       |   |
|                |                     |                        | <i>T. capito</i>          | Pale Yellow Robin         | 1                       |   |
|                | Hirundinidae        | Hirundo                | <i>H. neoxena</i>         | Welcome Swallow           | 1                       |   |
|                | Maluridae           | Malurus                | <i>M. cyaneus</i>         | Suberb Fairy Wren         | 13                      |   |
|                | Meliphagidae        | Acanthagenys           | <i>A. rufogularis</i>     | Spiney-cheeked Honeyeater | 1                       |   |
|                |                     |                        | <i>A. tenuirostris</i>    | Eastern Spinebill         | 1                       |   |
|                |                     | Anthochaera            | <i>A. carunculata</i>     | Red wattlebird            | 2                       |   |
|                |                     |                        | <i>A. chrysoptera</i>     | Little wattlebird         | 1                       |   |
|                |                     |                        | <i>A. sp</i>              | Wattle Bird               | 1                       |   |
|                |                     | Ardea                  | <i>A. pacifica</i>        | White-necked Heron        | 1                       |   |
|                |                     | Entomyzon              | <i>E. cyanotis</i>        | Blue-faced Honeyeater     | 1                       |   |
|                |                     | Lichenostomus          | <i>L. chrysops</i>        | <i>L. chrysops</i>        | Yellow-faced Honeyeater | 1 |
|                |                     |                        |                           | <i>L. fuscus</i>          | Fuscous Honeyeater      | 5 |
|                |                     |                        |                           | <i>L. penicillatus</i>    | White-plumed Honeyeater | 6 |
|                |                     |                        |                           | <i>L. versicolor</i>      | Singing Honeyeater      | 1 |
|                |                     | Manorina               | <i>M. melanocephala</i>   | Noisy Minor               | 4                       |   |
|                |                     | Philemon               | <i>P. citreogularis</i>   | <i>P. citreogularis</i>   | Little Friar Bird       | 3 |
|                |                     |                        |                           | <i>P. corniculatus</i>    | Noisy Friarbird         | 3 |
|                |                     | Phylidonyris           | <i>P. novaehollandiae</i> | New Holland Honeyeater    | 2                       |   |
|                |                     | Monarchinae            | Grallina                  | <i>G. cyanoleuca</i>      | Magpie Lark             | 6 |
|                |                     |                        | Monarcha                  | <i>M. trivirgatus</i>     | Spectacled Monarch      | 1 |
|                | Rhipidura           |                        | <i>R. fulginosa</i>       | Grey Fantail              | 8                       |   |
|                |                     | <i>R. leucophrys</i>   | Willie Wagtail            | 2                         |                         |   |
|                | Muscicapidae        | Turdus                 | <i>T. merula</i>          | Common Blackbird          | 6                       |   |
|                | Oriolidae           | Specotheress           | <i>S. viridis</i>         | Figbird                   | 1                       |   |
|                | Pardalotidae        | Acanthiza              | <i>A. pusilla</i>         | Brown Thornbill           | 1                       |   |
|                |                     | Hylacola               | <i>H. pyrhopygia</i>      | Chestnut-rumped Heathwren | 1                       |   |
|                |                     | Origma                 | <i>O. solitaria</i>       | Rock Warbler              | 1                       |   |
|                |                     | Sericornis             | <i>S. citreogularis</i>   | Yellow-throated Scrubwren | 2                       |   |
|                | <i>S. frontalis</i> |                        | White-browed Scrubwren    | 6                         |                         |   |
|                | Passeridae          | Neochmia               | <i>N. temporalis</i>      | Red-browed Finch          | 1                       |   |
|                |                     | Passer                 | <i>P. Poultryus</i>       | House Sparrow             | 6                       |   |
|                |                     | Taeniopygia            | <i>T. bichenovii</i>      | Double-barred Finch       | 1                       |   |
|                | <i>T. guttata</i>   |                        | Zebra Finch               | 1                         |                         |   |
|                | Pomatostomidae      | Pomatostomus           | <i>P. superciliosus</i>   | White-browed Babbler      | 4                       |   |
|                | Ptilinorhynchidae   | Chlamydera             | <i>C. maculata</i>        | Spotted Bowerbird         | 1                       |   |
|                |                     | Ptilinorhynchus        | <i>P. violaceus</i>       | Satin Bowerbird           | 3                       |   |
|                | Sturnidae           | Sturnus                | <i>S. vulgaris</i>        | Starling                  | 1                       |   |
|                | Pelecaniformes      | Ardeidae               | <i>E. novaehollandiae</i> | White-faced Heron         | 1                       |   |
|                |                     |                        | <i>N. caledonicus</i>     | Nankeen Night Heron       | 1                       |   |
|                | Podicipediformes    | Podicipedidae          | Polioccephalus            | <i>P. polioccephalus</i>  | Hoary-headed Grebe      | 1 |
|                | Procellariiformes   | Procellariidae         | Puffinus                  | <i>P. tenuirostris</i>    | Shearwater              | 1 |
| Psittaciformes | Cacatuidae          | <i>C. galerita</i>     | Sulphur-crested Cockatoo  | 1                         |                         |   |
|                |                     | <i>C. roseicapilla</i> | Galah                     | 3                         |                         |   |
|                |                     | <i>C. sanguinea</i>    | Little Corella            | 4                         |                         |   |
|                |                     | <i>C. tenuirostris</i> | Long-billed Corella       | 62                        |                         |   |

|                   |                   |                   |                           |                            |                 |
|-------------------|-------------------|-------------------|---------------------------|----------------------------|-----------------|
| Psittaciformes    | Cacatuidae        | Eolophus          | <i>E. roseicapilla</i>    | Galah                      | <b>4</b>        |
|                   | Psittacidae       | Barnardius        | <i>B. zonanius</i>        | Mallee Australian Ringneck | <b>8</b>        |
|                   |                   |                   | <i>B. zonarius</i>        | Mallee Australian Ringneck | <b>3</b>        |
|                   | Trichoglossus     |                   | <i>T. chlorolepidotus</i> | Scaley-breasted Lorikeet   | <b>3</b>        |
|                   |                   |                   | <i>T. haematodus</i>      | Rainbow Lorikeet           | <b>26</b>       |
|                   | Psittaculidae     | Glossopsitta      | <i>G. concinna</i>        | Musk Lorikeet              | <b>1</b>        |
|                   |                   |                   | Platycercus               | <i>P. elegans</i>          | Crimson Rosella |
| <i>P. eximius</i> |                   |                   |                           | Eastern Rosella            | <b>1</b>        |
|                   | Purpureicephalus  | <i>P. spurius</i> | Red-capped Parrot         | <b>2</b>                   |                 |
| Strigiformes      | Podargidae        | Podargus          | <i>P. strigoides</i>      | Tawny Frogmouth            | <b>32</b>       |
|                   | Strigidae         | Ninox             | <i>N. novaeseelandiae</i> | Boobook Owl                | <b>3</b>        |
|                   | Tytonidae         | Tyto              | <i>T. alba</i>            | Barn Owl                   | <b>1</b>        |
| Struthioniformes  | Dromaiidae        | Dromaius          | <i>D. novaehollandiae</i> | Emu                        | <b>4</b>        |
| Suliformes        | Phalacrocoracidae | Phalacrocorax     | <i>P. fuscescens</i>      | Cormorant                  | <b>8</b>        |

Table S2: Number of birds sampled by human association group and locality

| <b>Human Association</b> | <b>State *</b> |            |            |            |            |            |            | <b>Total</b> |
|--------------------------|----------------|------------|------------|------------|------------|------------|------------|--------------|
|                          | <b>Unknown</b> | <b>ACT</b> | <b>NSW</b> | <b>QLD</b> | <b>TAS</b> | <b>VIC</b> | <b>WA</b>  |              |
| In-Care                  | 1              | 8          | 39         | 91         | 49         | 7          | 49         | <b>244</b>   |
| Poultry                  | 5              | 10         | 118        | 4          | 0          | 19         | 0          | <b>156</b>   |
| Suburban                 | 0              | 18         | 0          | 0          | 23         | 7          | 78         | <b>126</b>   |
| Wild                     | 0              | 5          | 55         | 4          | 0          | 4          | 0          | <b>68</b>    |
| <b>Total</b>             | <b>6</b>       | <b>41</b>  | <b>212</b> | <b>99</b>  | <b>72</b>  | <b>37</b>  | <b>127</b> | <b>594</b>   |

\*ACT = Australian Capital Territory, NSW = New South Wales, QLD = Queensland, TAS = Tasmania, VIC = Victoria, WA = Western Australia
